# Supplementary material for: Repeatability and reproducibility of Keratograph 5M corneal topography
Source: PeerJ. 2025 May 22;13:e19478. doi: 10.7717/peerj.19478 (PMC12103842; doi:10.7717/peerj.19478)
Supplement: Supplemental Information 1 [file peerj-13-19478-s001.xlsx]

## Sheet: Measurements Keratograph
Subject	K1_M1_S1	K1_M2_S1	K1_M3_S1	K1_M1_S2	K1_M2_S2	K1_M3_S3	K2_M1_S1	K2_M2_S1	K2_M3_S1	K2_M1_S2	K2_M2_S2	K2_M3_S3	MaxK_M1_S1	MaxK_M2_S1	MaxK_M3_S1	MaxK_M1_S2	MaxK_M2_S2	MaxK_M3_S3	HorizontalEccentric_M1_S1	HorizontalEccentric_M2_S1	HorizontalEccentric_M3_S1	HorizontalEccentric_M1_S2	HorizontalEccentric_M2_S2	HorizontalEccentric_M3_S3	VerticalEccentric_M1_S1	VerticalEccentric_M2_S1	VerticalEccentric_M3_S1	VerticalEccentric_M1_S2	VerticalEccentric_M2_S2	VerticalEccentric_M3_S3	TotalEccentric_M1_S1	TotalEccentric_M2_S1	TotalEccentric_M3_S1	TotalEccentric_M1_S2	TotalEccentric_M2_S2	TotalEccentric_M3_S3	CornealDiameter_M1_S1	CornealDiameter_M2_S1	CornealDiameter_M3_S1	CornealDiameter_M1_S2	CornealDiameter_M2_S2	CornealDiameter_M3_S3	Coma_M1_S1	Coma_M2_S1	Coma_M3_S1	Coma_M1_S2	Coma_M2_S2	Coma_M3_S3	Trefoil_M1_S1
1	44	44.2	44	44	44	44.1	44.8	45.1	44.8	44.8	44.9	44.9	45.6	45.9	46	45.5	45.5	45.7	0.41	0.43	0.39	0.4	0.38	0.4	0.45	0.44	0.42	0.42	0.43	0.52	0.43	0.43	0.41	0.41	0.4	0.46	11.74	11.69	11.73	11.75	11.77	11.71	0.381	0.387	0.38	0.33	0.35	0.342	0.266
2	45.4	45.6	45.7	45.7	45.6	45.6	45.9	46	46.1	46	45.8	46	45.9	46.3	46.4	46.4	46.1	46.6	0.6	0.56	0.58	0.56	0.55	0.58	0.54	0.58	0.61	0.53	0.44	0.53	0.57	0.57	0.59	0.54	0.5	0.55	10.95	10.93	10.9	10.93	10.95	10.95	0.212	0.198	0.191	0.165	0.165	0.173	0.083
3	44.4	43.9	44.2	44.4	44.5	44.5	44.5	44.1	44.5	44.5	44.6	44.7	44.8	44.7	44.5	44.6	44.7	44.9	0.68	0.72	0.69	0.67	0.68	0.69	0.62	0.7	0.66	0.63	0.67	0.63	0.65	0.71	0.68	0.65	0.67	0.66	11.55	11.19	11.03	11	11.11	11.1	0.067	0.08	0.04	0.074	0.087	0.061	0.075
4	41.6	41.6	41.8	41.8	41.9	41.8	41.9	41.8	41.9	42	42.2	42	42.1	42.2	42.1	42.3	42.6	42.2	0.65	0.72	0.65	0.67	0.67	0.67	0.39	0.52	0.54	0.59	0.62	0.59	0.52	0.62	0.6	0.63	0.65	0.63	12.35	12.28	12.36	12.35	12.43	12.36	0.196	0.236	0.18	0.215	0.228	0.214	0.024
5	45.7	45.8	45.7	45.8	45.8	45.7	46.7	46.8	46.8	46.8	46.8	46.7	47.3	47.3	47.2	47.3	47.1	47.3	0.37	0.38	0.35	0.34	0.35	0.36	0.22	0.21	0.32	0.13	0.22	0.17	0.3	0.29	0.34	0.24	0.28	0.27	11.42	11.47	11.46	11.52	11.55	11.53	0.225	0.238	0.203	0.183	0.174	0.212	0.323
6	40.3	40.5	40.5	40.6	40.7	40.5	41.2	41.4	41.4	41.6	41.7	41.3	42.1	41.9	41.8	42.2	42.2	42	0.62	0.6	1.02	0.68	0.68	0.72	0.55	0.55	1.06	0.61	0.62	0.54	0.58	0.58	1.04	0.64	0.65	0.63	11.51	11.57	11.53	11.5	11.53	11.56	0.29	0.305	0.29	0.264	0.283	0.338	0.078
7	44	44.1	44.3	44.4	44.1	44.2	44.2	44.4	44.5	44.6	44.3	44.4	44.6	44.9	45.2	45.1	44.5	44.9	0.62	0.59	0.62	0.63	0.58	0.62	0.66	0.65	0.69	0.65	0.61	0.68	0.64	0.62	0.66	0.64	0.6	0.65	12.17	12.15	12.11	12.1	11.96	12.11	0.128	0.138	0.102	0.125	0.085	0.127	0.072
8	42.3	42.3	42.1	42.6	42.4	42.5	44	44	43.8	44.3	44.1	44.2	44.8	44.4	44.2	44.9	44.7	45	0.67	0.65	0.65	0.66	0.67	0.66	0.82	0.8	0.82	0.77	0.76	0.76	0.75	0.72	0.73	0.72	0.72	0.71	11.35	11.36	11.39	11.45	11.36	11.43	0.278	0.281	0.296	0.303	0.321	0.337	0.013
9	44.9	45	45.2	45	45	45.1	45.7	45.6	45.8	45.6	45.5	45.6	46	45.8	46.2	46.1	45.7	46.1	0.48	0.48	0.48	0.48	0.48	0.47	0.49	0.44	0.47	0.39	0.44	0.28	0.48	0.46	0.48	0.44	0.46	0.37	11.39	11.42	11.35	11.43	11.38	11.38	0.08	0.038	0.038	0.069	0.046	0.063	0.217
10	42	42.2	42.2	42.5	42.4	42.6	42.9	43	43	43.3	43.1	43.2	43.3	43.6	43.8	43.9	48.8	44	0.57	0.55	0.58	0.58	0.61	0.55	0.56	0.54	0.52	0.61	0.64	0.59	0.56	0.54	0.55	0.59	0.62	0.57	11.55	11.53	11.6	11.4	11.52	11.47	0.207	0.286	0.281	0.263	0.331	0.322	0.234
11	38.7	38.8	38.7	38.7	39.1	38.9	39.2	39.3	39.2	39.1	39.6	39.3	39.6	39.7	39.7	39.5	40	39.9	0.56	0.57	0.62	0.56	0.6	0.54	0.55	0.59	0.59	0.55	0.58	0.52	0.56	0.58	0.6	0.55	0.59	0.53	12.4	12.41	12.52	12.38	12.28	12.29	0.054	0.066	0.04	0.065	0.053	0.096	0.142
12	41.9	42	41.9	41.8	41.7	42	42.2	42.4	42.2	42.1	42	42.2	42.5	42.7	42.4	42.4	42.6	42.7	0.5	0.48	0.51	0.5	0.49	0.5	0.38	0.51	0.47	0.46	0.4	0.47	0.44	0.49	0.49	0.48	0.45	0.49	12.06	12.17	12.05	12.14	12.14	12.17	0.174	0.116	0.126	0.16	0.214	0.206	0.162
13	45.3	45.1	45.3	45.2	45.1	45.2	46	45.9	46	45.8	45.8	45.9	46.8	46.5	46.6	46.5	46.5	46.6	0.57	0.53	0.54	0.56	0.54	0.58	0.64	0.62	0.64	0.63	0.65	0.65	0.61	0.58	0.59	0.59	0.6	0.62	11.75	11.79	11.73	11.69	11.71	11.7	0.181	0.136	0.131	0.187	0.117	0.163	0.007
14	43.8	43.7	43.8	43.7	43.9	44	45.5	45.5	45.5	45.5	45.5	45.7	45.8	45.6	46.1	45.8	45.9	45.8	0.64	0.62	0.62	0.62	0.66	0.66	0.67	0.67	0.66	0.68	0.72	0.69	0.66	0.64	0.64	0.65	0.69	0.68	12.24	12.17	12.11	12.14	12.18	12.17	0.143	0.136	0.165	0.163	0.159	0.178	0.057
15	41.9	41.9	42.4	42.2	42.2	42.2	42.6	42.6	43.1	42.8	42.7	42.7	42.7	42.5	43.6	43.1	43.1	42.8	0.55	0.47	0.57	0.5	0.58	0.55	0.52	0.51	0.6	0.49	0.51	0.57	0.54	0.49	0.59	0.49	0.54	0.56	11.65	11.6	11.52	11.75	11.63	11.64	0.157	0.146	0.101	0.103	0.101	0.044	0.129
16	43.3	43.4	43.4	43.4	43.2	43.4	45.8	45.9	45.9	45.9	45.7	45.8	46.2	46.4	46.5	46.5	45.8	46.2	0.4	0.39	0.42	0.44	0.45	0.43	0.53	0.56	0.53	0.56	0.53	0.56	0.47	0.47	0.47	0.5	0.49	0.5	11.69	11.66	11.63	11.76	11.74	11.79	0.103	0.102	0.125	0.116	0.132	0.118	0.09
17	44.7	44.6	44.6	44.5	44.7	44.3	45.7	45.7	45.6	45.5	45.7	45.4	46.4	46.2	46.1	46.1	46.4	46	0.46	0.45	0.46	0.44	0.46	0.43	0.55	0.56	0.55	0.53	0.55	0.53	0.51	0.5	0.5	0.49	0.5	0.48	12.08	12.07	12.06	12.14	12.03	12.03	0.262	0.234	0.231	0.236	0.252	0.267	0.11
18	44	43.3	43.9	43.7	43.8	44	45	44.2	45.1	44.9	45	45.2	45.3	44.6	45.2	44.9	45.1	45.5	0.53	0.51	0.5	0.54	0.54	0.53	0.62	0.64	0.66	0.67	0.63	0.65	0.58	0.57	0.58	0.61	0.58	0.59	11.56	11.57	11.52	11.58	11.53	11.52	0.24	0.258	0.237	0.245	0.247	0.283	0.127
19	45.5	45.5	45.5	45.4	45.3	45.4	47.1	47.1	47.1	46.9	46.8	46.9	47.3	47.7	48.2	47.4	47.2	47.2	0.5	0.52	0.51	0.53	0.51	0.51	0.55	0.56	0.55	0.53	0.53	0.55	0.52	0.54	0.53	0.53	0.52	0.53	11.86	11.84	11.84	11.85	11.88	11.84	0.259	0.29	0.238	0.231	0.208	0.205	0.133
20	42.9	42.7	43	42.9	42.8	42.7	43.9	43.8	44	43.8	43.6	43.6	44.2	44.3	44.3	44.1	44.2	44.3	0.57	0.56	0.59	0.59	0.59	0.59	0.59	0.56	0.56	0.61	0.6	0.59	0.58	0.56	0.57	0.6	0.59	0.59	11.79	11.78	11.78	11.79	11.76	11.73	0.232	0.238	0.248	0.301	0.258	0.295	0.096
21	42.5	42.5	42.4	42	42.5	42.7	42.9	42.9	42.9	42.3	42.9	42.9	43.4	43.4	43.1	42.5	44.2	43.2	0.55	0.53	0.54	0.52	0.6	0.57	0.53	0.49	0.59	0.48	0.61	0.48	0.54	0.51	0.56	0.5	0.61	0.53	11.77	11.56	11.65	11.78	11.66	11.62	0.161	0.142	0.155	0.11	0.198	0.124	0.082
22	44	43.9	44.1	44.3	44	43.6	45.1	45	45.1	45.4	45.2	44.8	45.4	45.4	45.6	46.1	45.4	46.5	0.56	0.56	0.53	0.55	0.55	0.5	0.63	0.67	0.65	0.65	0.65	0.63	0.6	0.62	0.59	0.6	0.6	0.57	11.72	11.85	11.8	11.73	11.8	12.09	0.175	0.198	0.186	0.221	0.181	0.127	0.083
23	40.1	41.2	41.3	41	41.1	41	40.6	41.8	41.9	41.6	41.6	41.6	41	42	42.1	42	41.7	41.7	0.58	0.59	0.6	0.61	0.57	0.61	0.45	0.55	0.46	0.53	0.49	0.5	0.51	0.57	0.53	0.57	0.53	0.56	12.16	12.12	12.05	12.27	12.15	12.1	0.157	0.109	0.108	0.169	0.161	0.158	0.085
24	43.2	43.2	43.2	43.1	43	42.9	44.5	44.5	44.5	44.4	44.3	44.2	44.9	45.3	44.8	45.1	45	44.8	0.48	0.5	0.49	0.49	0.52	0.51	0.57	0.61	0.6	0.58	0.54	0.59	0.52	0.55	0.55	0.53	0.53	0.55	12.47	12.48	12.47	12.47	12.47	12.47	0.143	0.124	0.115	0.147	0.097	0.111	0.023
[truncated: 23 more columns]
